# Supplementary material for: Formation mechanisms of atmospheric nitrate and sulfate during the winter haze pollution periods in Beijing: gas-phase, heterogeneous and aqueous-phase chemistry
Source: Copernicus journal article supplement (doi:10.5194/acp-20-4153-2020), 2020-04-07
Supplement: Supplementary file 1 [file acp-20-4153-2020-supplement.pdf]

Supplement of Atmos. Chem. Phys., 20, 4153–4165, 2020  
<https://doi.org/10.5194/acp-20-4153-2020-supplement>  
© Author(s) 2020. This work is distributed under  
the Creative Commons Attribution 4.0 License.

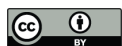

Atmospheric  
Chemistry  
and Physics  
Open Access  
EGU

*Supplement of*

## **Formation mechanisms of atmospheric nitrate and sulfate during the winter haze pollution periods in Beijing: gas-phase, heterogeneous and aqueous-phase chemistry**

**Pengfei Liu et al.**

*Correspondence to:* Yujing Mu ([yjmu@rcees.ac.cn](mailto:yjmu@rcees.ac.cn))

The copyright of individual parts of the supplement might differ from the CC BY 4.0 License.

1  
2  
3  
4  
5  
6  
7  
8  
9  
10  
11  
12  
13  
14  
15  
16  
17  
18  
19  
20  
21  
22

**This PDF file includes:**

- M1. Sample analysis for WSIs, OC and EC.
- M2. Measurements for atmospheric H<sub>2</sub>O<sub>2</sub> and HONO.
- M3. The Mass transport for multiphase reactions.
- Figure S1. The location of the sampling site.
- Figure S2. Time series of meteorological parameters (wind speed, wind direction, ambient temperature and RH), O<sub>3</sub> and PM<sub>2.5</sub> during the sampling period.
- Figure S3. The correlations between the concentrations of PM<sub>2.5</sub> and CO in the three cases during the sampling period.
- Figure S4. The average mass proportions of the species in PM<sub>2.5</sub> in the three cases during the sampling period.

23 ***Supplementary Information:***

24 **M1. Sample analysis for WSIs, OC and EC**

25 As for the filter samples, half of each filter was extracted ultrasonically with 10 mL ultrapure  
26 water for 30 minutes. The supernatants were filtered by a type of microporous membrane (diameter,  
27 13mm; pore size, 0.45  $\mu\text{m}$ ) and the WSIs in the filtrates were analyzed by an ion chromatography  
28 (Wayeal IC6200, China). Five cations ( $\text{Na}^+$ ,  $\text{K}^+$ ,  $\text{Ca}^{2+}$ ,  $\text{Mg}^{2+}$  and  $\text{NH}_4^+$ ) were separated through a  
29 cation column (TSKgelSuperIC-CR, 4.6 mm ID  $\times$  15 cm) with the solvent (2.2 mmol  $\text{L}^{-1}$  methane  
30 sulfonic acid and 1 mmol  $\text{L}^{-1}$  18-crown-6) flow rate of 0.7  $\text{mL min}^{-1}$  and column temperature of 40  
31  $^{\circ}\text{C}$ . Four anions ( $\text{Cl}^-$ ,  $\text{NO}_3^-$ ,  $\text{SO}_4^{2-}$  and  $\text{NO}_2^-$ ) were separated via an anion column (IC SI-52 4E, 4.0  
32 mm ID  $\times$  25 cm) with the solvent (3.6 mmol  $\text{L}^{-1}$  sodium carbonate) flow rate of 0.8  $\text{mL min}^{-1}$  and  
33 column temperature of 45  $^{\circ}\text{C}$ . The relative standard deviation (RSD) of each ion was not more than  
34 0.5 % for the reproducibility test. The detection limits ( $S/N=3$ ) were less than 1  $\mu\text{g L}^{-1}$  for the cations  
35 and anions. At least three filter blanks were simultaneously analyzed for every 60 filter samples,  
36 and the mean blank values were about 30  $\mu\text{g L}^{-1}$  for  $\text{Na}^+$ ,  $\text{Ca}^{2+}$ ,  $\text{NO}_2^-$ ,  $\text{NO}_3^-$  and  $\text{SO}_4^{2-}$ , 20  $\mu\text{g L}^{-1}$  for  
37  $\text{NH}_4^+$  and  $\text{Cl}^-$ , 10  $\mu\text{g L}^{-1}$  for  $\text{Mg}^{2+}$  and  $\text{K}^+$ . All ion concentrations were corrected for the blanks.

38 A quarter of each filter was heated with temperature programming to 140  $^{\circ}\text{C}$ , 280  $^{\circ}\text{C}$ , 480  $^{\circ}\text{C}$   
39 and 580  $^{\circ}\text{C}$  in the helium atmosphere for analyzing OC1, OC2, OC3 and OC4, respectively, and then  
40 to 580  $^{\circ}\text{C}$ , 780  $^{\circ}\text{C}$  and 840  $^{\circ}\text{C}$  in the atmosphere of 98 % helium and 2 % oxygen for analyzing EC1,  
41 EC2 and EC3, respectively, by using a thermal optical carbon analyzer (DRI-2001A). The pyrolyzed  
42 OC (POC) is defined as the carbon fraction that has combusted after the initial introduction of  
43 oxygen and before the laser reflectance signal returns its original value, and it is assigned to the OC  
44 fraction (Ma et al., 2016;Zhang et al., 2013). Then,  $\text{OC} = \text{OC1} + \text{OC2} + \text{OC3} + \text{OC4} + \text{POC}$  and EC

45 = EC1 + EC2 + EC3 – POC. The method calibration was performed with a concentration gradient  
46 of KHP standards ( $R^2 = 0.9997$ ,  $N=5$ ). A replicate sample was detected for every 10 filter samples,  
47 and the RSD of OC and EC was less than 5 %. The detection limits were  $0.82 \mu\text{gC cm}^{-2}$  and  $0.20$   
48  $\mu\text{gC cm}^{-2}$  for OC and EC, respectively.

## 49 **M2. Measurements for atmospheric H<sub>2</sub>O<sub>2</sub> and HONO**

50 Atmospheric H<sub>2</sub>O<sub>2</sub> was measured by a wet liquid chemistry fluorescence detector (AL 2021;  
51 AERO laser, Germany). When atmospheric H<sub>2</sub>O<sub>2</sub> is stripped by a faintly acid solution (pH = 5.8-  
52 6.0), organic peroxides are simultaneously detected by the catalysis of the horseradish peroxidase  
53 and then the reaction with *p*-hydroxyphenyl-acetic acid. In order to divide between H<sub>2</sub>O<sub>2</sub> and organic  
54 peroxides, two channels are designed and H<sub>2</sub>O<sub>2</sub> is selectively destroyed by catalase prior to the  
55 detection of fluorescence in one channel. Thus, the difference of the signal between the two channels  
56 can represent the H<sub>2</sub>O<sub>2</sub> concentration. The calibrations were performed with liquid H<sub>2</sub>O<sub>2</sub> standards  
57 ( $33.3 \mu\text{g L}^{-1}$ ) for both channels in every 1-3 days. There is an uncertainty of 10 %, a calibration RSD  
58 of 0.25 %, a detection limit of less than 50 ppt and a noise of less than 2 % at full scale for the H<sub>2</sub>O<sub>2</sub>  
59 monitor. Although some organic peroxides such as HOCH<sub>2</sub>OOH and CH<sub>3</sub>C(O)OOH have been  
60 found to decompose into H<sub>2</sub>O<sub>2</sub> in the collection solution at pH > 5 (O'Sullivan, 1996), their  
61 decomposition to H<sub>2</sub>O<sub>2</sub> during the short period of the sampling progress could be neglected due to  
62 their relatively slow hydrolysis rate (1–2 days) (O'Sullivan, 1996) and extremely low atmospheric  
63 concentrations (He et al., 2010).

64 Atmospheric HONO was measured by a wet chemical method that is named after stripping coil  
65 (SC) equipped with ion chromatograph (IC) and was described in detail by our previous studies  
66 (Xue et al., 2019a; Xue et al., 2019b). Briefly, hourly HONO samples were absorbed by ultrapure

67 water in the SC with the gas flow rate of 2 L min<sup>-1</sup> and the absorption solution flow rate of 0.2 mL  
 68 min<sup>-1</sup>. After sampling, the liquid samples were stored in a refrigerator around 4 °C and then analyzed  
 69 by IC in three or four days. The flow calibrations including the gas and liquid were performed once  
 70 a day, and the collection efficiency was more than 90 % and the correlations between the SC-IC and  
 71 other techniques were close to 0.9 (slope = 0.94~1.06) (Xue et al., 2019a).

### 72 **M3. The Mass transport for multiphase reactions**

73 The formula of a standard resistance model was adopted for evaluating the effects of mass  
 74 transport (Seinfeld and Pandis, 2006):

$$75 \quad \frac{1}{R_{S, aq}} = \frac{1}{R_{aq}} + \frac{1}{L_{aq, lim}} \quad (\text{S-R1})$$

76 where  $R_{S, aq}$  is the sulfate production rate,  $R_{aq}$  is the aqueous-phase reaction rate of oxidants  
 77 which could be calculated by the equations of R1-R4, and  $L_{aq, lim}$  is the limiting mass transfer rate  
 78 ( $\text{M s}^{-1}$ ) which could be calculated by the formulas as follows (Seinfeld and Pandis, 2006):

$$79 \quad L_{aq, lim} = \min\{L_{aq}(SO_2), L_{aq}(O_{xi})\} \quad (\text{S-R2})$$

$$80 \quad L_{aq}(X) = k_{MT}(X) \cdot [X] \quad (\text{S-R3})$$

81 where  $[X]$  represents the aqueous-phase concentrations of  $SO_2$  or the oxidants  $O_{xi}$  such as  $O_3$ ,  
 82  $H_2O_2$  and  $NO_2$ , which could be calculated based on Henry's law (R5-R7). The mass transfer rate  
 83 coefficient  $k_{MT}(X)$  ( $\text{s}^{-1}$ ) is expressed by the equations as follows (Seinfeld and Pandis, 2006):

$$84 \quad k_{MT}(X) = \left[ \frac{R^2}{3D} + \frac{4R}{3\alpha v} \right]^{-1} \quad (\text{S-R4})$$

85 where  $R$  is the aerosol radius (0.15  $\mu\text{m}$ ),  $D$  is the gas-phase molecular diffusion coefficient (0.2  
 86  $\text{cm}^2 \text{s}^{-1}$  at 293 K),  $v$  is the average molecular speed ( $3 \times 10^4 \text{ cm s}^{-1}$ ), and  $\alpha$  is the mass accommodation  
 87 coefficient (0.11, 0.23,  $2 \times 10^{-3}$  and  $2 \times 10^{-4}$  for  $SO_2$ ,  $H_2O_2$ ,  $O_3$  and  $NO_2$ , respectively) on the droplet  
 88 surface (Jacob, 2000; Seinfeld and Pandis, 2006).

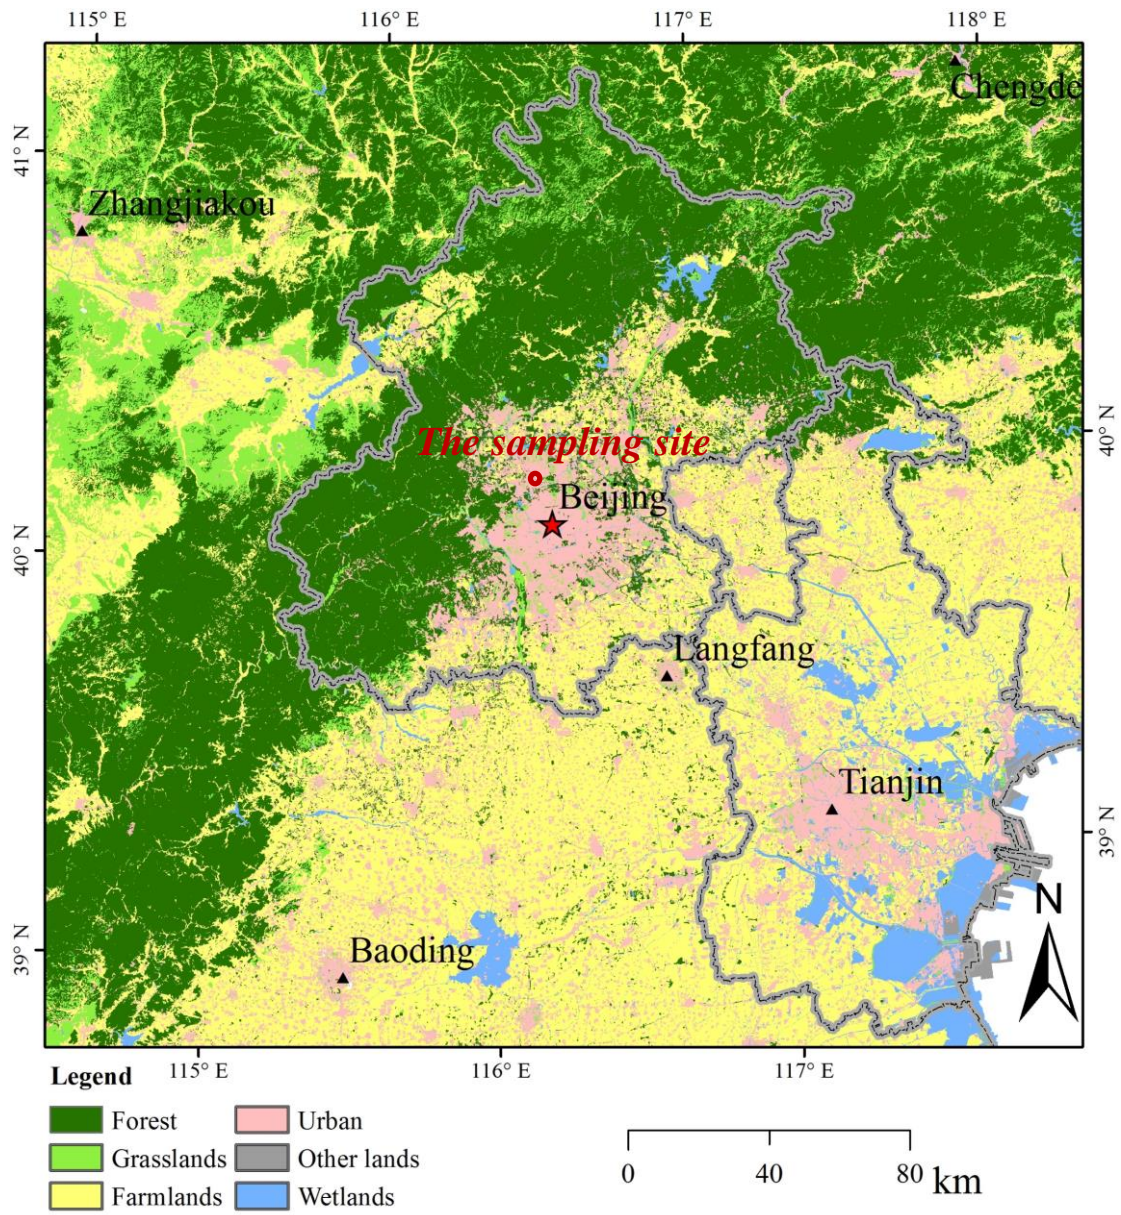

90

91

**Figure S1.** The location of the sampling site.

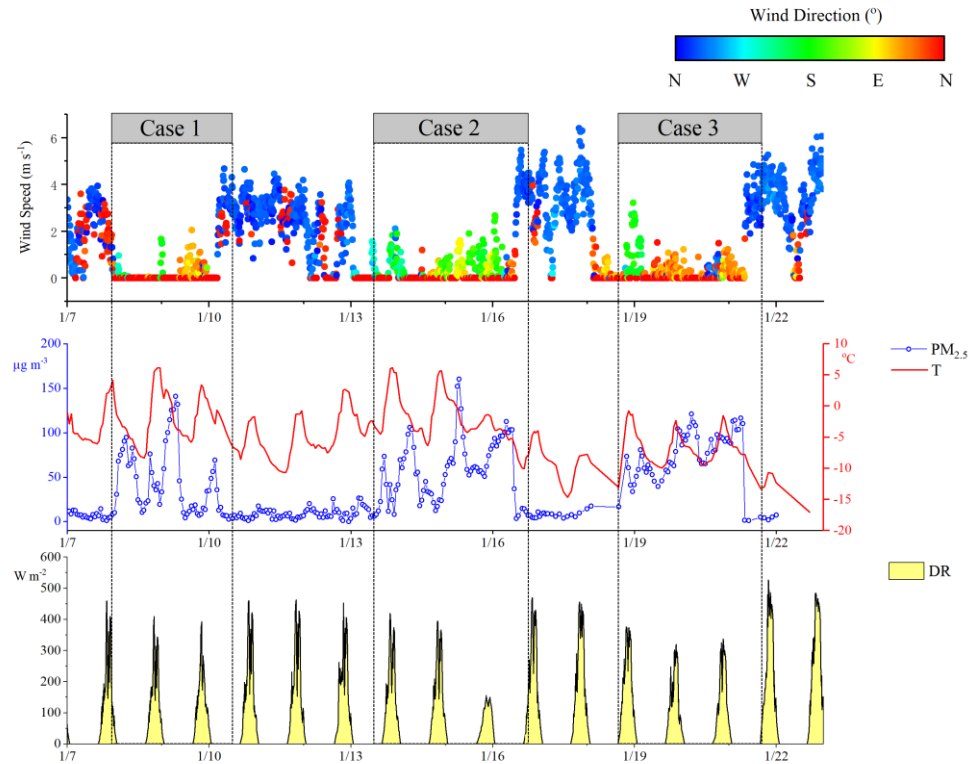

92

93

**Figure S2.** Time series of meteorological parameters (wind speed, wind direction, ambient temperature and DR) and PM<sub>2.5</sub> during the sampling period.

94

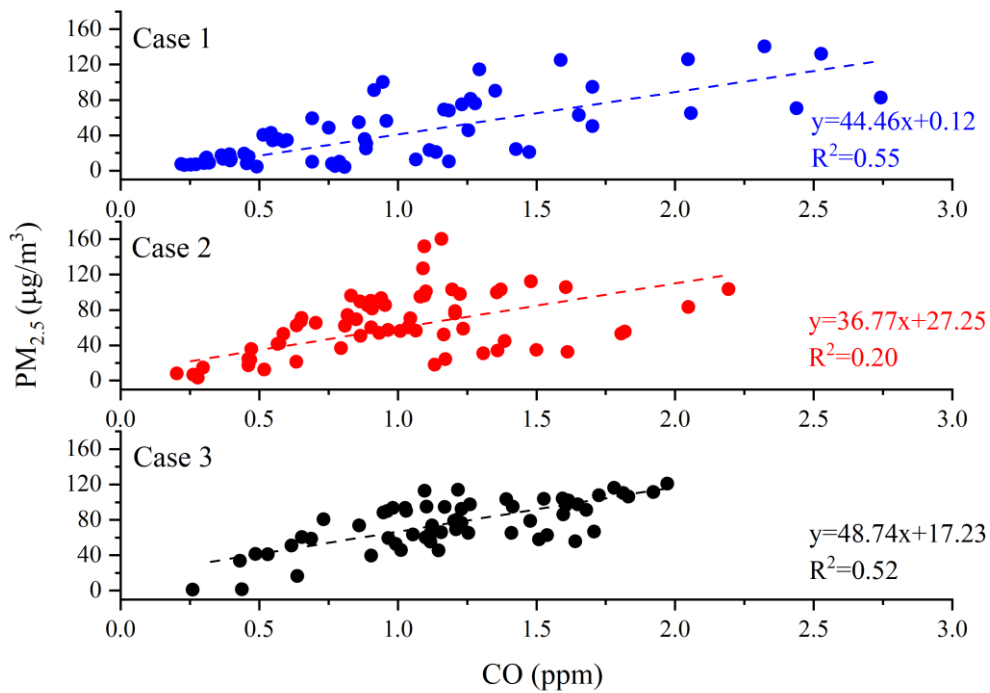

95

96

**Figure S3.** The correlations between the concentrations of PM<sub>2.5</sub> and CO in the three cases during the sampling period.

97

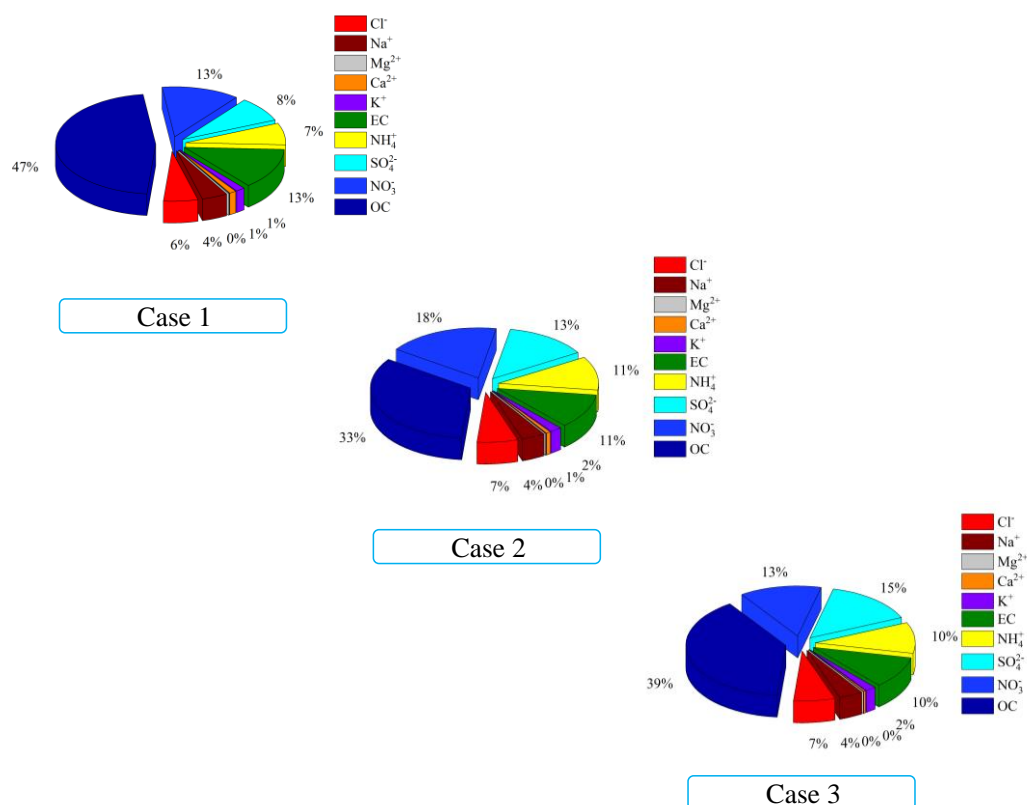

**Figure S4.** The average mass proportions of the species in PM<sub>2.5</sub> in the three cases during the sampling period.

## References

- He, S. Z., Chen, Z. M., Zhang, X., Zhao, Y., Huang, D. M., Zhao, J. N., Zhu, T., Hu, M., and Zeng, L. M.: Measurement of atmospheric hydrogen peroxide and organic peroxides in Beijing before and during the 2008 Olympic Games: Chemical and physical factors influencing their concentrations, *Journal of Geophysical Research*, 115, 10.1029/2009jd013544, 2010.
- Jacob, D. J.: Heterogeneous chemistry and tropospheric ozone, *Atmospheric Environment*, 34, 2131-2159, 2000.
- Ma, X., Wu, J., Zhang, Y., Bi, X., Sun, Y., and Feng, Y.: Size-Classified Variations in Carbonaceous Aerosols from Real Coal-Fired Boilers, *Energy & Fuels*, 30, 39-46, 10.1021/acs.energyfuels.5b01770, 2016.
- O'Sullivan, D. W. J. J. o. P. C.: Henry's Law Constant Determinations for Hydrogen Peroxide, Methyl Hydroperoxide, Hydroxymethyl Hydroperoxide, Ethyl Hydroperoxide, and Peroxyacetic Acid, 100, 3241-3247, 1996.
- Seinfeld, J. H., and Pandis, S. N.: *Atmospheric Chemistry and Physics, from Air Pollution to Climate Change*, Wiley, 429-443 pp., 2006.
- Xue, C., Ye, C., Ma, Z., Liu, P., Zhang, Y., Zhang, C., Tang, K., Zhang, W., Zhao, X., Wang, Y., Song, M., Liu, J., Duan, J., Qin, M., Tong, S., Ge, M., and Mu, Y.: Development of stripping coil-ion chromatograph method and intercomparison with CEAS and LOPAP to measure atmospheric HONO, *The Science of the total environment*, 646, 187-195, 10.1016/j.scitotenv.2018.07.244, 2019a.



122 Xue, C., Ye, C., Zhang, Y., Ma, Z., Liu, P., Zhang, C., Zhao, X., Liu, J., and Mu, Y.: Development  
123 and application of a twin open-top chambers method to measure soil HONO emission in the North  
124 China Plain, *Sci. Total Environ.*, 659, 621-631, 10.1016/j.scitotenv.2018.12.245, 2019b.  
125 Zhang, R., Jing, J., Tao, J., Hsu, S. C., Wang, G., Cao, J., Lee, C. S. L., Zhu, L., Chen, Z., Zhao, Y.,  
126 and Shen, Z.: Chemical characterization and source apportionment of PM<sub>2.5</sub> in Beijing: seasonal  
127 perspective, *Atmospheric Chemistry and Physics*, 13, 7053-7074, 10.5194/acp-13-7053-2013, 2013.
